# Supplementary material for: In silico analyses of mitochondrial ORFans in freshwater mussels (Bivalvia: Unionoida) provide a framework for future studies of their origin and function
Source: PubMed Central journal article supplement (PMC4979158; doi:10.1186/s12864-016-2986-6), 2016-08-09

Cedric Notredame  
SCORE=696

\*  
BAD AVG GOOD  
\*

Cumberland\_atp8 : 58  
Cumberland\_Morf : 60  
H\_sapiens\_atp8 : 70  
Malawimonasatp8 : 78  
Thraustoch\_atp8 : 77  
Mesostigma\_atp8 : 77  
Reclinomon\_atp8 : 76  
Porphyra\_atp8 : 72  
Cyanidiosc\_atp8 : 79  
Pseudendoc\_atp8 : 78  
Acanthamoe\_atp8 : 78  
Nephroselm\_atp8 : 77  
cons : 69

Cumberland\_atp8 MPQ-FSP-MSWSVISLLVACHFLVIC---VV---LWWLG-AG-----G---YF  
Cumberland\_Morf MKATLCKVIEFVLNDGWLCLFYFVLFMACSN-----VLWRVYKVRK---GLY-K---KV  
H\_sapiens\_atp8 MPQ-LNT-TVWPTMITPMLLLTLFLITOLKMLNTNYHLPPSPKPMKMNYN-----KP  
Malawimonasatp8 MPQ-LDN-VTFLSQIFWCFFITFSLLYFIVLKNI---LPNIAKVLKIRK---KLF-D---YY  
Thraustoch\_atp8 MPQ-LDF-ITFTSQIFWLLIIFFIYVFFNQSI---VPFLARVLKIRR---KKS-FCNRKL  
Mesostigma\_atp8 MPQ-LDW-ITFLPQFVAVGFISFYIVCLRFF---LPRLARIFKVRN---AKAYS---DV  
Reclinomon\_atp8 MPQ-LDK-VTFFSQYFWLLIIFLTFYFFVFLKIV---LPTVVVTFKLRK---KKL-E---AM  
Porphyra\_atp8 MPQ-LDR-VIIFSQIFWLFMLFVAYISYAHFV---LSNVLKIFLVRWVKLRKDKIT-Q---VA  
Cyanidiosc\_atp8 MPQ-LDR-VIIVTQIFWLLLIMIVAYSFVIKRI---LPSSFRLKIRE---NFI-K---DL  
Pseudendoc\_atp8 MPQ-LDT-LTYFTQFVFLLVSFYIYYFVITYI---IPNTLTARKLRA---KFN-S---QL  
Acanthamoe\_atp8 MPQ-LDK-LSFATQYFWLTLFFFGLYFLSVNFF---VILVFKNLKLRN---IYI-K---IW  
Nephroselm\_atp8 MPQ-LDQ-VTFFSQFFWLCFFFTFYAVLLKSF---LPKMNRI LRFRK---KIH-Q---AS

cons \* : 

Cumberland\_atp8 --V-----SFFGEG--EVMLPLR-E---FGFNVC-----  
Cumberland\_Morf --KRVI-----GVIWKP-----TAVS-----  
H\_sapiens\_atp8 WEPKWTK-IC--S-LHSL-----  
Malawimonasatp8 -N-----SLFNNIN--TI--NN-N---Y---IVFKS-SDISNLF  
Thraustoch\_atp8 -TT-----AFFNENK--VL--FS-E---YDSALVKSS-RSLNNLF  
Mesostigma\_atp8 -SSK-----RTKMKL--EPL--H-S---FDSLNCNSL-EVSTGWI  
Reclinomon\_atp8 -ASEVE---QLKKEQ--SSI--LS-N---YDSVLIDSF-SSSREIF  
Porphyra\_atp8 LKSRLTK-LLIDSNSHSLREIYSAA--KSILLSLT--KKL---FDSNLNNPKI--SLQDL  
Cyanidiosc\_atp8 -IL-----N-V--E--KL--NK-E---ONTOL-KNT-IKLNQHY  
Pseudendoc\_atp8 -ESSKGL--LQV-PSEL---GGEAFIGELALESLT--SEA---FTQLACKSAASTVEDL  
Acanthamoe\_atp8 -YFFLYRFDYV--DYNNKH--KSL--VN-TSFSFIYYTLYINFFILTKNIFI  
Nephroselm\_atp8 -SD-----SYVGEY--QSL--LQ-N---YHTARIPEI-RTSTEHL

cons 

Cumberland\_atp8 -----  
Cumberland\_Morf VKI--KKD-----K-----VEKPKV--MEK--AK-----  
H\_sapiens\_atp8 -----P-----PQS-----  
Malawimonasatp8 FII--NKNINDYNEIYK--NINNNNSYISNNIRN-----  
Thraustoch\_atp8 VNH--NSSLQSWVSINKGLFFINN-NFLDTKFLS-----  
Mesostigma\_atp8 QES--REEASNWEKSN-YQWR-----TNKK-S--LDQIKSSFQMLA--ENSHRR  
Reclinomon\_atp8 NST--VSKSNKWIDES-AR-S-----LNKTSL--LD-VNK--KYLNAINDINKE  
Porphyra\_atp8 NSLVLK-----VSLET-SL-----YSSK--SI---TKS  
Cyanidiosc\_atp8 -----INLIKNIILVQN-KFYDEILSNYYKIFI--KK-IN---LKE  
Pseudendoc\_atp8 NA--TN-KTGKHNISQ-AL-M-----LHYTYA--LA-----NKK  
Acanthamoe\_atp8 FEK--TKS-----I-----INKTQT--LNQ--SQRLLM--ISLLNN  
Nephroselm\_atp8 SKV--LGNTRNWVEST-LL-Q-----LNQTNEQNKQ-MNR--MYVRSIGEMTISQ

cons 

Cumberland\_atp8 -----  
Cumberland\_Morf -----KGKKAAVSGK--VGKKS-----G  
H\_sapiens\_atp8 -----YS-----LLNITRKLKSKVITNGK  
Malawimonasatp8 -----YL-----ILIQSRF--FMVS-R  
Thraustoch\_atp8 -----FLFSEDLNFKGSKSPVTEK---IELGKIKYLRRSFT---L  
Mesostigma\_atp8 -----YL-----AFNKIK--SL--I  
Reclinomon\_atp8 -----GIYSHW-----T-----  
Porphyra\_atp8 -----TFFTYA-----SFMQLYK--NLIQRYLIN  
Cyanidiosc\_atp8 -----GLLNYE-----L-----TA--A  
Pseudendoc\_atp8 -----F-----LNSNSVDFVKKFQELNIDEI  
Acanthamoe\_atp8 -----  
Nephroselm\_atp8 TMMTTGFDLVFPPIQASQNTGVAKQ--KLYAQR-----ILNRLK--KKATSR

cons 

Supplement: 12864_2016_2986_MOESM4_ESM.pdf [file 12864_2016_2986_MOESM4_ESM.pdf]
