# Supplementary material for: In silico analyses of mitochondrial ORFans in freshwater mussels (Bivalvia: Unionoida) provide a framework for future studies of their origin and function
Source: PubMed Central journal article supplement (PMC4979158; doi:10.1186/s12864-016-2986-6), 2016-08-09

### A. M vs M complete mitochondrial genomes

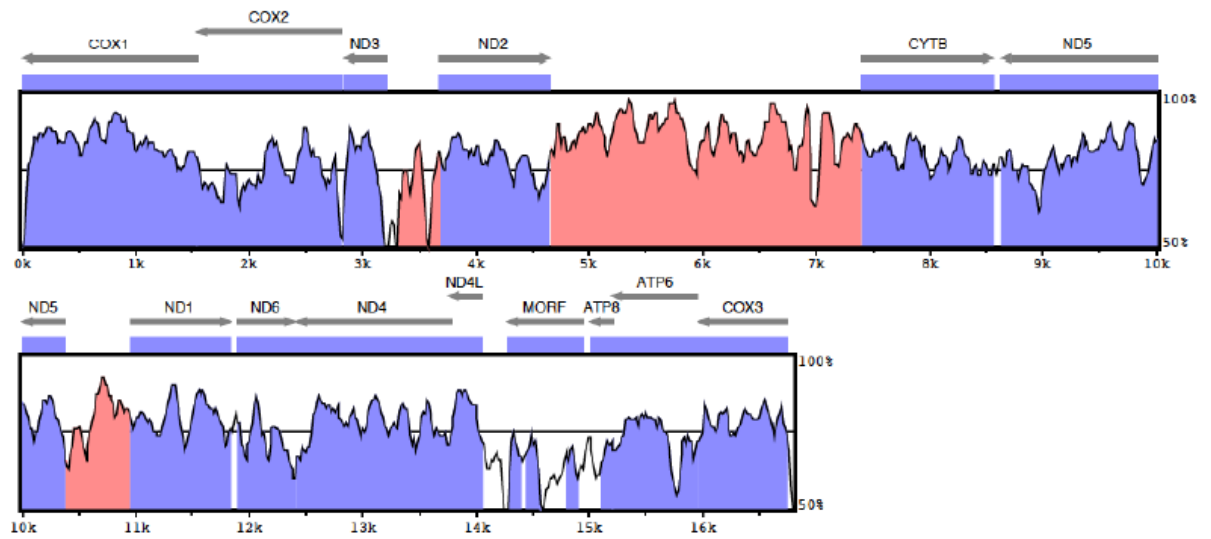

### B. F vs F complete mitochondrial genomes

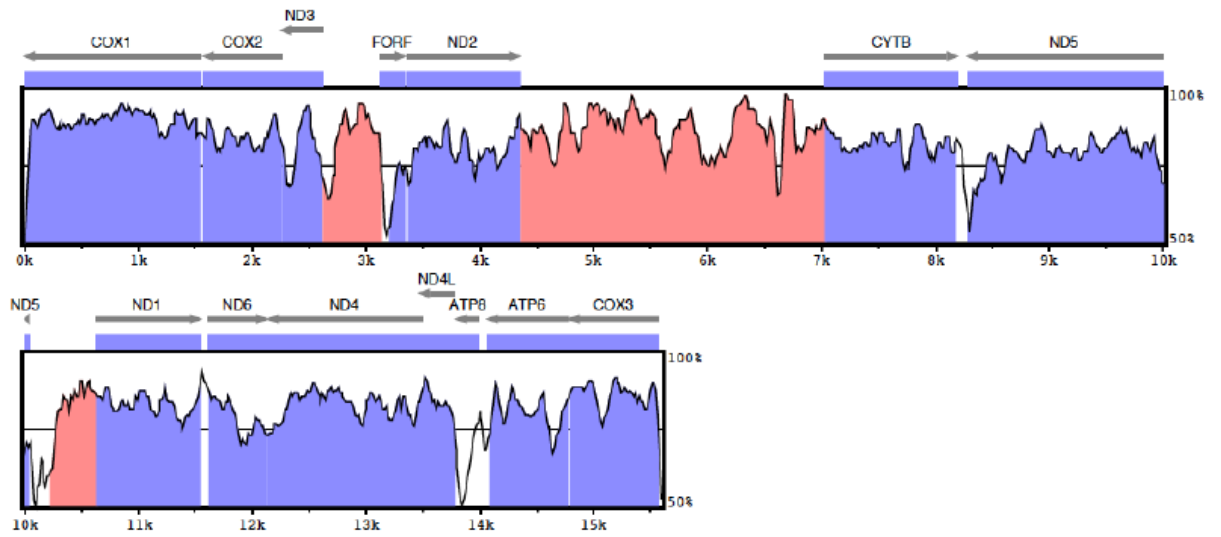

### C. F vs H complete mitochondrial genomes

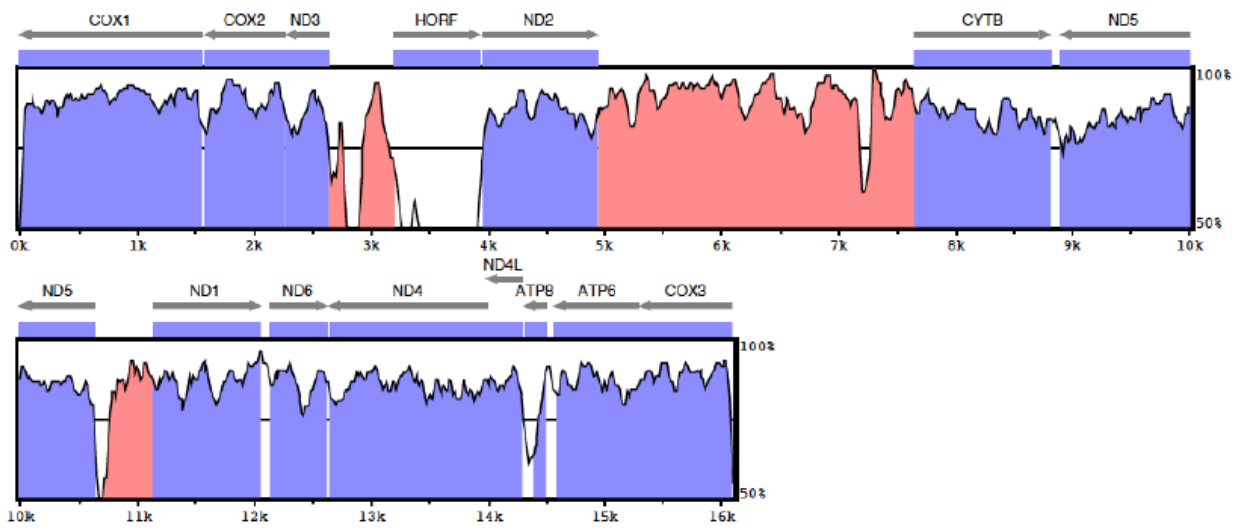

Supplement: 12864_2016_2986_MOESM3_ESM.pdf [file 12864_2016_2986_MOESM3_ESM.pdf]
