# Supplementary material for: In silico analyses of mitochondrial ORFans in freshwater mussels (Bivalvia: Unionoida) provide a framework for future studies of their origin and function
Source: PubMed Central journal article supplement (PMC4979158; doi:10.1186/s12864-016-2986-6), 2016-08-09
Supplement: 12864_2016_2986_MOESM5_ESM.pdf [file 12864_2016_2986_MOESM5_ESM.pdf]

T-COFFEE, Version\_11.00.d625267 (2016-01-11 15:25:41 - Revision d625267 - Build 507)  
Cedric Notredame  
SCORE=536

\*  
BAD AVG GOOD

\*  
Cumberland\_Forf : 75  
Cumberland\_nad2 : 41  
cons : 53

Cumberland\_Forf MAIMT--LIILIPLSYLPLIWSNTDNLKTANN-----  
Cumberland\_nad2 MKSPHKLLFVLLMTTSTATVLSSSNWLVTWIGLEINMIGFIPLMYKTTANESETAVKYLIPQ

cons \* . \* . \* . : . : \* . : \* \* .

Cumberland\_Forf -----L-KMKPIAHDLPKSKHPTS-----  
Cumberland\_nad2 SLGSTMFITSAISHSDNIQSLMPIAMCLKLGAAFPFWFPAVMSGLSLTPAFILLTWQKIA

cons . : . : \* \* \* \* \* . \*

Cumberland\_Forf -----IT-----  
Cumberland\_nad2 PIFAISSMNPTLITKILPVAGISALWGGIGGLNQTVDVRLLSYSSIAHTGWMLASISAPSEVL

cons . : \* .

Cumberland\_Forf -----KPOPNDTOTSNEHSPNTYKPKKSKA-----  
Cumberland\_nad2 TLYLMTYVMINTSLFIALLONSVKLHKQLFPSSQKPYESFLLAITILSLGGLPPLTGFIMKLL

cons \* . : . : \* . : \* \* : \*

Cumberland\_Forf -----STNLTNDKP NATKEP-----  
Cumberland\_nad2 VLMFSEAKMIIMMTLILGAIMSLYYYLTTFSPLLSLHKMPISQLKLITSASTSFLLSQILPL

cons \* . \* : . \* : :

Cumberland\_Forf -----  
Cumberland\_nad2 SLLLLFF

cons
