# Supplementary material for: In silico analyses of mitochondrial ORFans in freshwater mussels (Bivalvia: Unionoida) provide a framework for future studies of their origin and function
Source: PubMed Central journal article supplement (PMC4979158; doi:10.1186/s12864-016-2986-6), 2016-08-09
Supplement: 12864_2016_2986_MOESM6_ESM.pdf [file 12864_2016_2986_MOESM6_ESM.pdf]

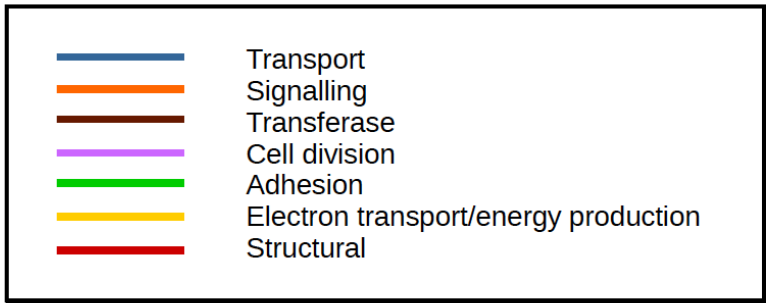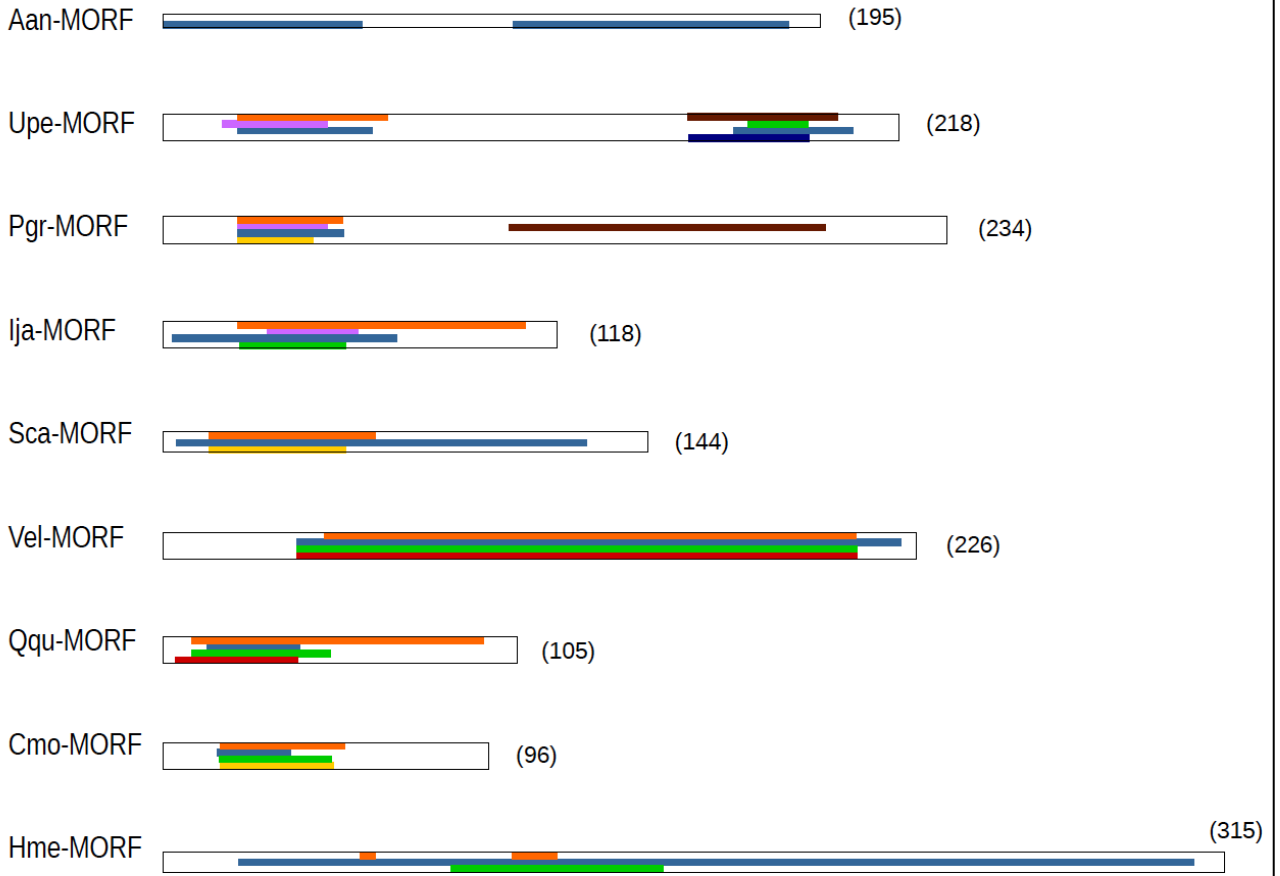

A

Aan-FORF (78)

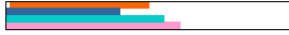

Upe-FORF (70)

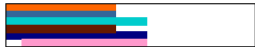

Pgr-FORF (85)

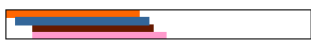

Lco-FORF (77)

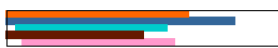

Ija-FORF (66)

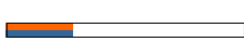

Sca-FORF (86)

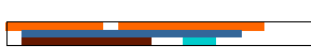

Tli-FORF (113)

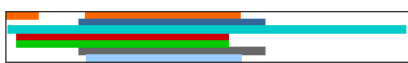

Vel-FORF (89)

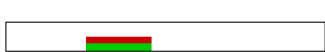

Qqu-FORF (80)

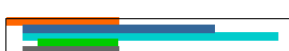

Mma-FORF (110)

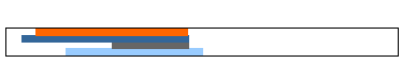

Cmo-FORF (91)

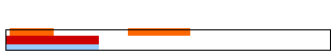

Hme-FORF (92)

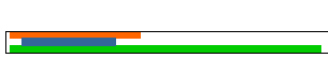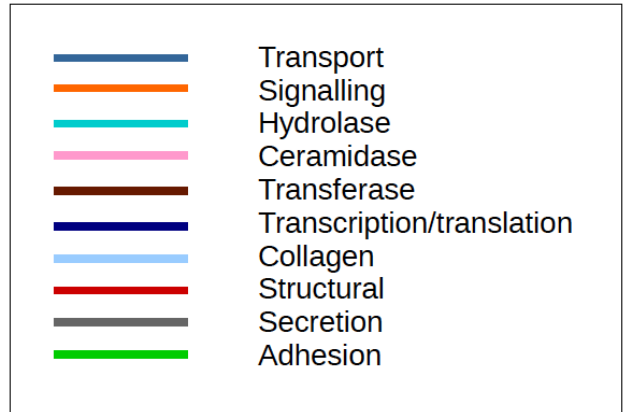

B

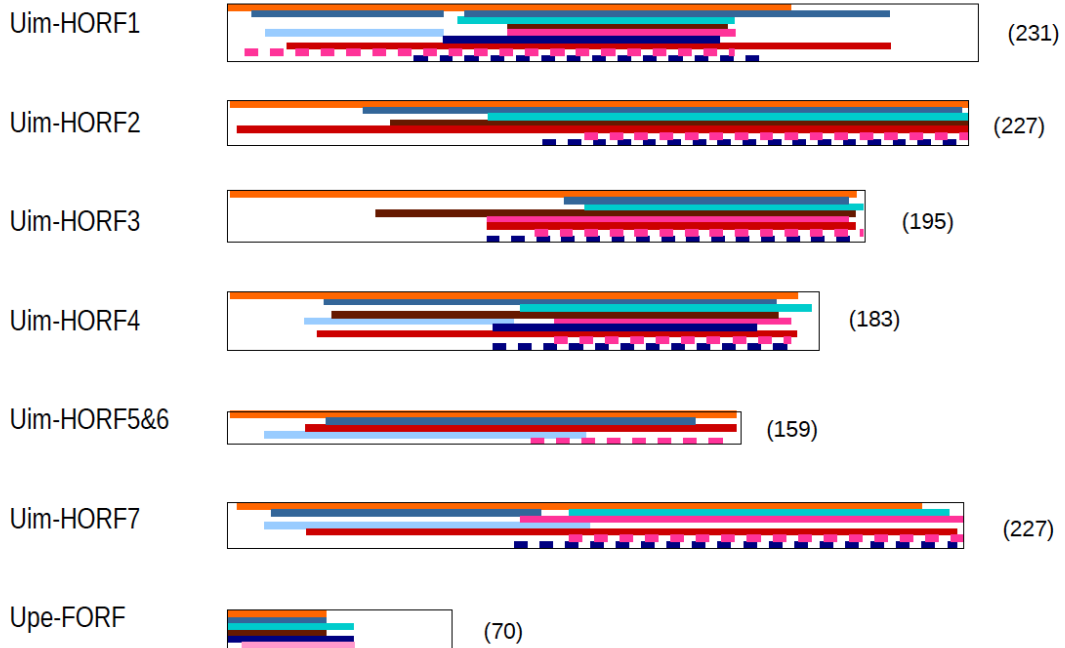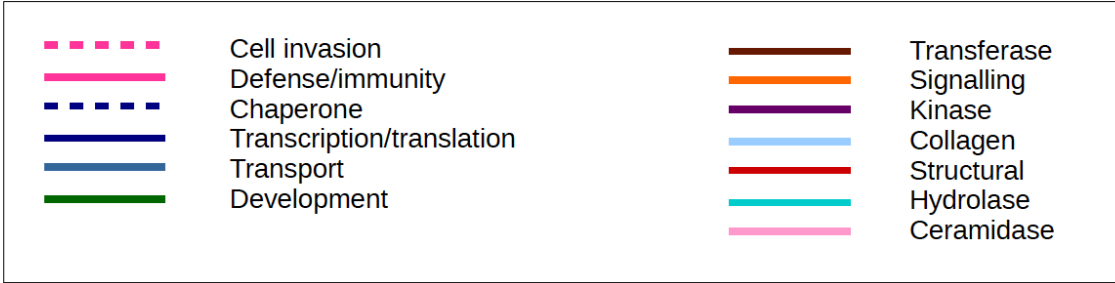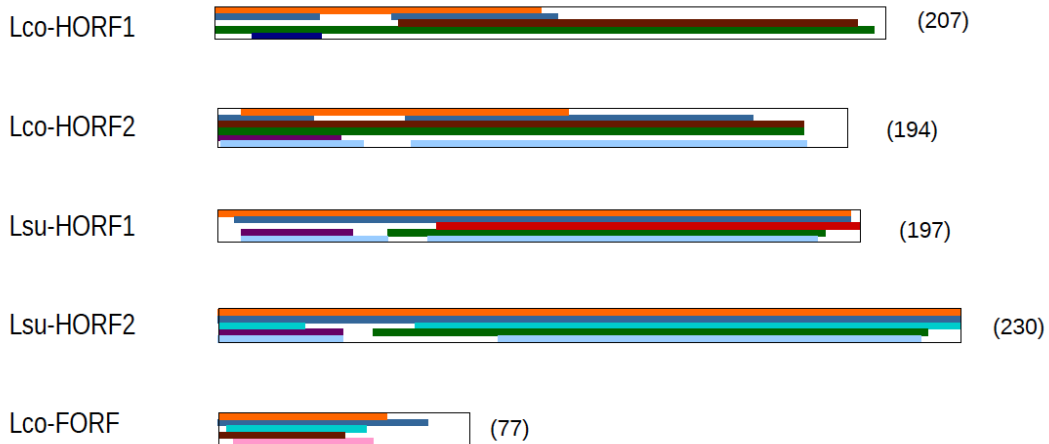

C

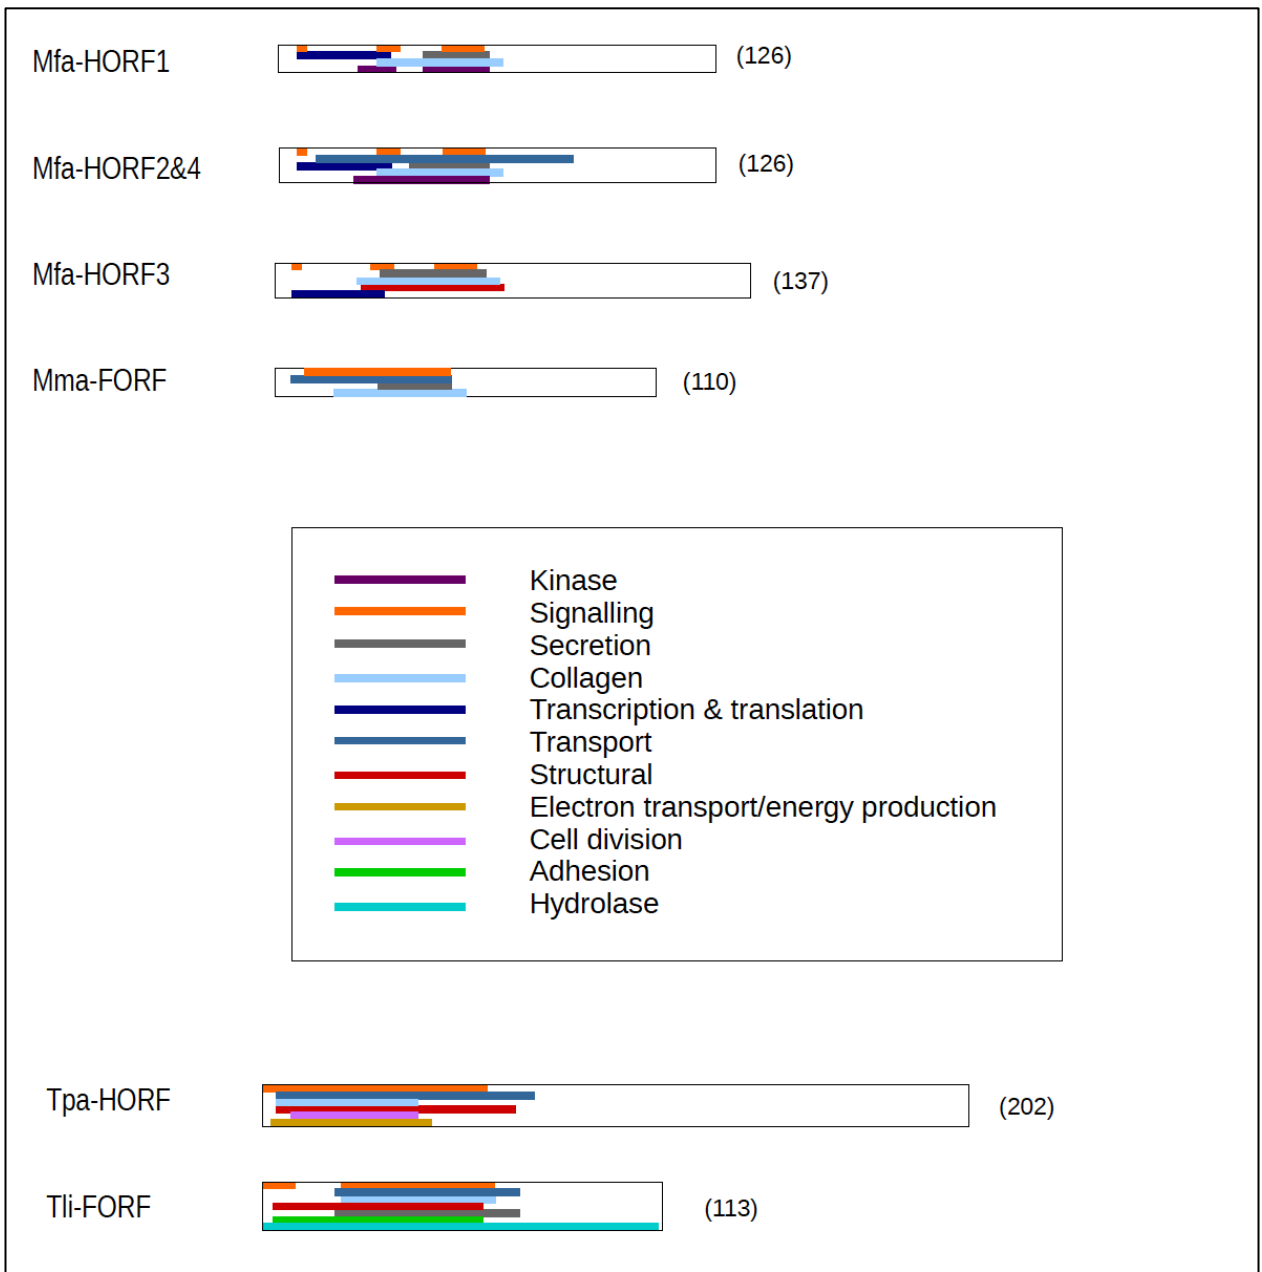

D
